# Supplementary material
Source: MDPI journal article supplement (https://www.mdpi.com/2311-7524/10/5/438)
Supplement: s1 [file s1]

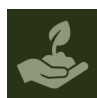Table S1. Content of mineral elements in the root soil of *D. brandisii*

| Time     | Mineral elements in the root soil |                             |                          |                          |                         |                          |                         |
|----------|-----------------------------------|-----------------------------|--------------------------|--------------------------|-------------------------|--------------------------|-------------------------|
|          | Zn (mg·100g <sup>-1</sup> )       | Fe (ug·100g <sup>-1</sup> ) | Ca (mg·g <sup>-1</sup> ) | AK (ug·g <sup>-1</sup> ) | K (mg·g <sup>-1</sup> ) | AP (ug·g <sup>-1</sup> ) | P (mg·g <sup>-1</sup> ) |
| March 10 | <b>0.805±0.309a</b>               | 8.463±3.260a                | <b>3.007±0.384b</b>      | <b>74.540±30.363a</b>    | <b>0.824±0.490b</b>     | 19.292±14.531a           | 0.262±0.220a            |
| July 30  | <b>0.344±0.288b</b>               | 8.188±4.731a                | <b>4.289±0.210a</b>      | <b>56.332±16.553b</b>    | <b>1.234±0.377a</b>     | 20.694±13.793a           | 0.258±0.096a            |

The time 'March 10 and July 30' mean an early stage and a flourishing stage of bamboo shoots emerging, respectively. The difference in mineral elements content between two time points was determined using a t-test, and the significant results ( $p < 0.05$ ) were indicated by different letters.
